# Supplementary material for: Hydrochloric acid accelerated formation of planar CH3NH3PbI3 perovskite with high humidity tolerance
Source: Royal Society of Chemistry journal article supplement (doi:10.1039/c5ta06172e), 2015-01-01
Supplement: c5ta06172e1.pdf [file c5ta06172e1.pdf]

## Supporting Information

### Hydrochloric Acid Accelerated Formation of Planar $\text{CH}_3\text{NH}_3\text{PbI}_3$ Perovskite with High Humidity Tolerance

Ge Li<sup>a</sup>, Taiyang Zhang<sup>a</sup> and Yixin Zhao<sup>a\*</sup>

*School of Environmental Science and Engineering, Shanghai Jiao Tong University, 800*

*Dongchuan Rd., Shanghai 200240, China; E-mail: yixin.zhao@sjtu.edu.cn*

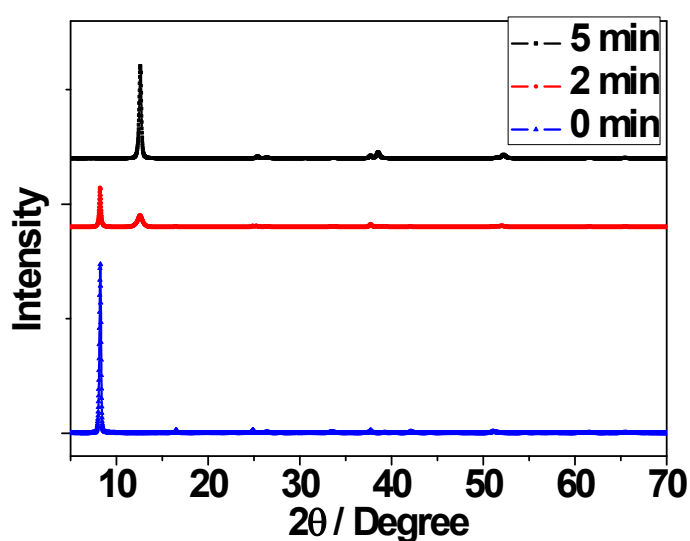

**Figure S1.** The XRD pattern evolution of planar  $\text{HCl}\cdot\text{PbI}_2$  film after 100 °C annealing for different durations.

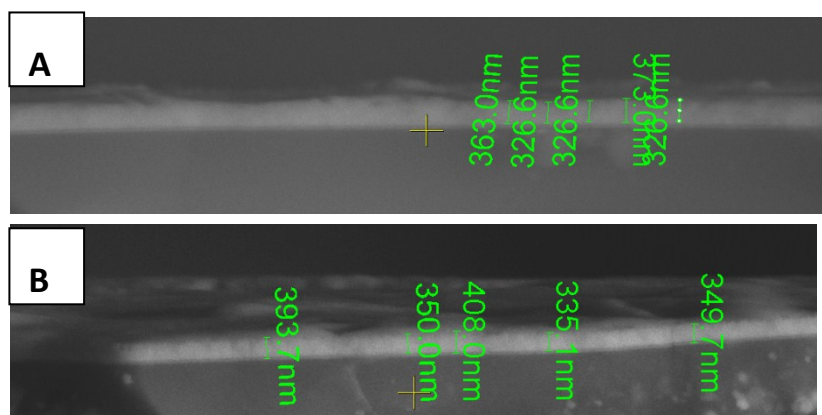

**Figure S2.** The cross sectional SEM images of  $\text{HCl}\cdot\text{PbI}_2$  precursor film (A) and the corresponding perovskite film (B).

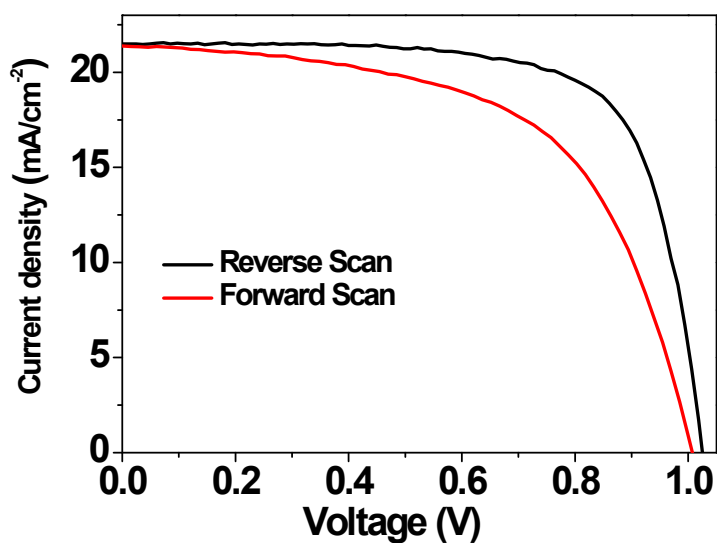

**Figure S3.** The typical  $J$ - $V$  curve of a planar  $\text{MAPbI}_3$  solar cell with the highest efficiency of 15.50% ( $J_{\text{sc}}=21.50 \text{ mA/cm}^2$ ,  $V_{\text{oc}}=1.03 \text{ V}$ ,  $\text{FF}=0.72$ ) and 12.62% ( $J_{\text{sc}}=21.40 \text{ mA/cm}^2$ ,  $V_{\text{oc}}=1.00 \text{ V}$ ,  $\text{FF}=0.59$ ) under reverse/backward voltage scan at simulated one-sun illumination.

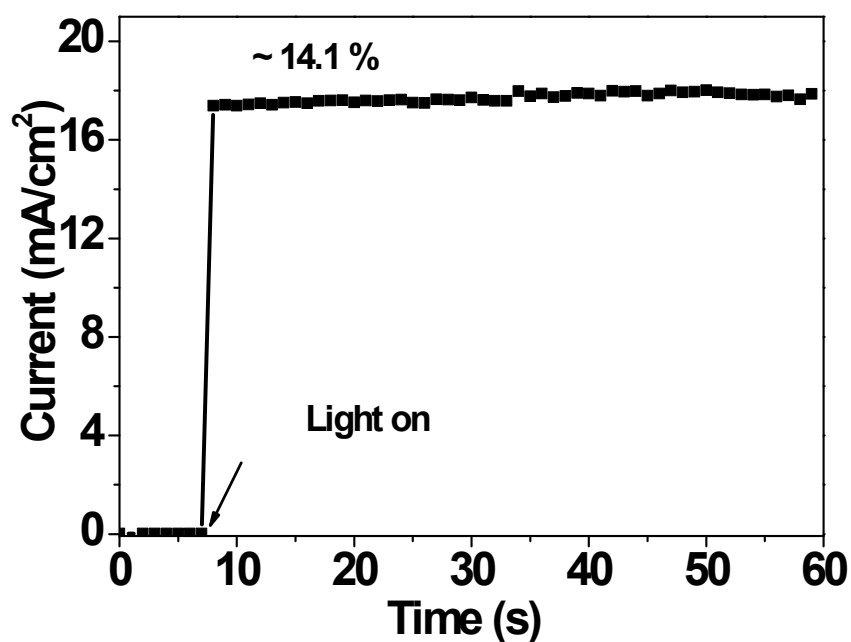

**Figure S4.** Stability of power conversion efficiency as a function of time for a planar perovskite solar cells with a 0.81V bias potential under simulated one-sun illumination.
